# Supplementary material for: Electrochemical performance of nano-sized LiFePO4-embedded 3D-cubic ordered mesoporous carbon and nitrogenous carbon composites
Source: Royal Society of Chemistry journal article supplement (doi:10.1039/d0ra04754f), 2020-01-01
Supplement: d0ra04754f1.pdf [file d0ra04754f1.pdf]

**Electronic Supplementary Material (ESI)**

**Electrochemical Performance of Nano-sized  $\text{LiFePO}_4$  Embedded 3D-Cubic  
Ordered Mesoporous Carbon and Nitrogenous Carbon**

Sourav Khan,<sup>a</sup> Rayappan Pavul Raj,<sup>a</sup> Talla Venkata Rama Mohan,<sup>a</sup> and Parasuraman Selvam<sup>\*a-d</sup>

---

<sup>a</sup>National Centre for Catalysis Research and Department of Chemistry, Indian Institute of Technology-Madras, Chennai 600 036, India

<sup>b</sup>School of Chemical Engineering and Analytical Science, The University of Manchester, Manchester M13 9PL, United Kingdom.

<sup>c</sup>Department of Chemical and Process Engineering, University of Surrey, Guildford, Surrey GU2 7XH, United Kingdom.

<sup>d</sup>Department of Chemistry, Faculty of Advanced Science and Technology, Kumamoto University, 2-39-1 Kurokami, Chuo-ku, Kumamoto 860-8555, Japan

**\*Corresponding Author.**

Tel.: +91 -44-2257-4235/4200

E-mail: selvam@iitm.ac.in

**This PDF file includes: ESI Figures S1 and S2**

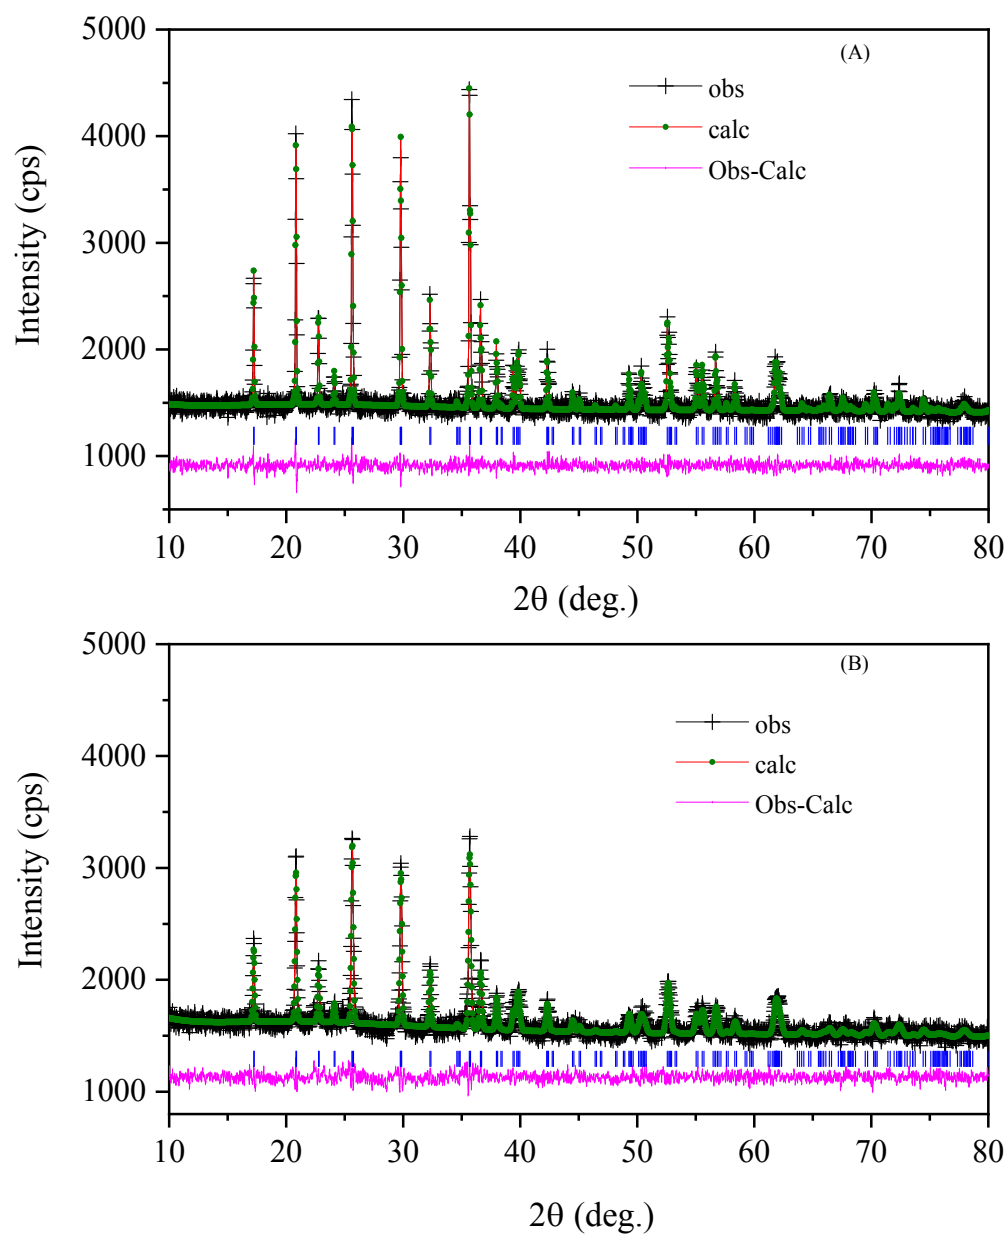

**Figure S1.** Rietveld refined XRD patterns of: (A) LFP/CSI-809 and (B) LFP/MNC-859.

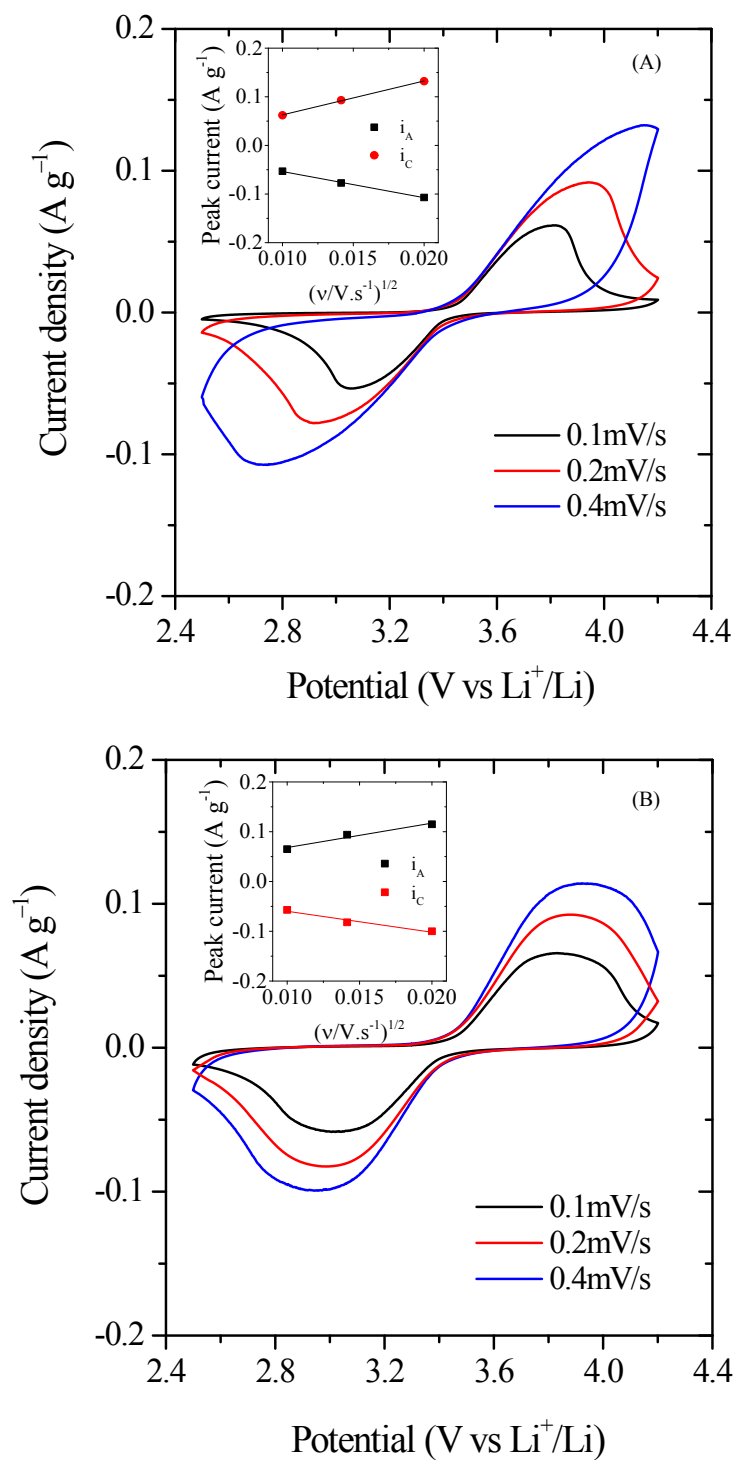

**Figure S2.** Cyclic Voltamograms of: A) LFP + CMK-8 and B) LFP + MNC-81 at different scan rates. Inset - Relationship between the peak currents and  $v^{1/2}$  at various scan rates.

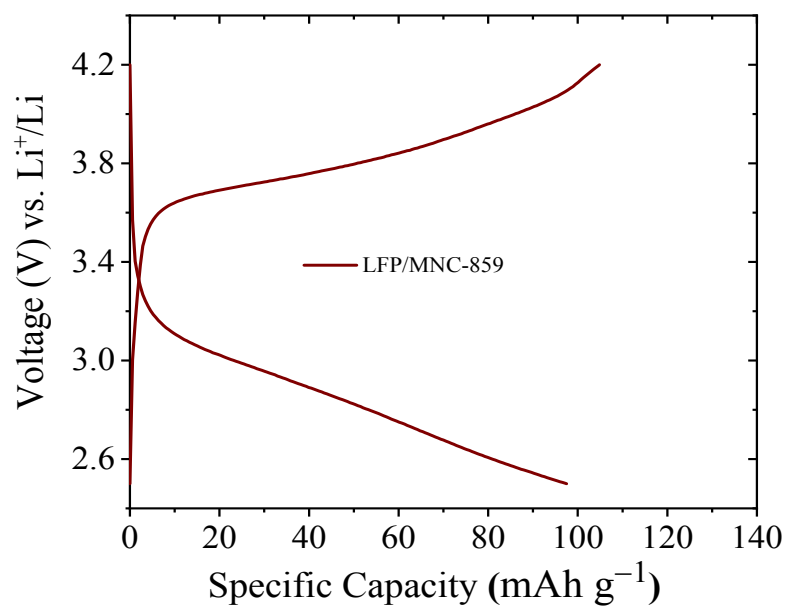

**Figure S3.** Galvanostatic charge-discharge profiles recorded at 0.1C rate for LFP/MNC-859 composite without addition of Super P carbon black during electrode fabrication.
